# Supplementary material for: TBR is an RG-I rhamnose O-acetyltransferase required for epidermal cell adhesion in Arabidopsis thaliana
Source: Research Square preprint supplement (doi:10.21203/rs.3.rs-5416360/v1), 2024-12-27
Supplement: Supplementary file 1 [file 484556a78b1728dfb5fdb5be.xlsx]

## Sheet: Cutin monomers
Data Set S1. GC-MS analysis of cuticle composition in tbr mutants.
a) GC-MS analysis of absolute [ng x mg fresh weight-1] and relative [% of total] abundance of cutin monomers in tbr mutants.
Values [ng x leaf cm-2 ] are means ± SD (n = 6 individual plants per line).
Asterisks denote statistical differences (*, p < 0.05; ***, p < 0.001) to Col-0 or pGC1:YC3.6 according to two-way ANOVA followed by Tukey's multiple comparisons test.
FW, fresh weight.
Compound	pGC1:YC3.6				tbr-6				tbr-7				Col-0				tbr-1
	ng x mg FW-1	± SD	% of total	± SD	ng x mg FW-1	± SD	% of total	± SD	ng x mg FW-1	± SD	% of total	± SD	ng x mg FW-1	± SD	% of total	± SD	ng x mg FW-1	± SD	% of total	± SD
Hexadecanedioic acid (α,ω-dicarboxyl 16:0)	20.7041	2.34306	13.2822	2.78898	15.7001	2.41831	10,05***	0.969146	10.5778	1.04187	8,33***	0.535794	18.2375	4.28726	13.5404	2.50668	15.5753	2.54897	11,13*	2.54341
18-carboxy 9,12-cis octadecadienoic acid (α,ω-dicarboxyl 18:2)	93.3494	22.6756	57.5471	3.47491	88.1681	21.6177	55.3912	1.81965	75.5555	9.00463	59.2691	1.21047	78.656	32.121	54.0876	4.50222	79.1062	22.1901	53.9256	2.85649
18-carboxy 9-cis octadecadecenoic acid (α,ω-dicarboxyl 18:1)	11.1124	2.1722	6.93518	0.678458	11.794	2.03253	7.51974	0.625599	11.3601	1.77469	8.89782	0.564927	11.7461	3.81642	8.37159	0.937258	13.9382	3.36326	9.63812	1.01825
16-hydroxy hexadecanoic acid (16:0-ω-hydroxy)	2.56637	0.68711	1.62937	0.397264	3.42727	0.588686	2.19608	0.274304	1.85034	0.28719	1.45206	0.135904	2.98168	0.811095	2.20254	0.416594	3.02724	0.492795	2.16636	0.482767
18-hydroxy 9,12-cis octadecadienoic acid (18:2-ω-hydroxy)	16.3549	3.75926	10.1269	0.616536	17.4272	5.6214	10.8113	1.29086	12.3932	2.19678	9.74087	1.46309	13.0418	6.03895	8.76298	1.52673	13.7934	4.40875	9.32714	1.0814
18-hydroxy 9-cis octadecadecenoic acid (18:1-ω-hydroxy)	7.36117	0.975737	4.65529	0.503663	10.2801	1.46085	6.60382	0.851444	7.19041	1.02488	5.66268	0.693994	8.65962	2.26183	6.36571	1.17158	8.31925	1.75942	5.79955	0.631653
10,16-dihydroxy hexadecanoic acid	7.09794	0.814484	4.53804	0.848015	7.93473	1.21332	5.09641	0.703365	4.96719	1.11967	3.89452	0.699878	6.18197	1.21011	4.71184	1.28947	7.78988	1.66204	5.45012	0.707051
Docosanoic acid (22:0)	0.966752	0.5936	0.5911	0.315072	1.97097	0.39893	1.2567	0.205368	1.68683	0.380032	1.31531	0.16953	1.30316	0.314608	0.978859	0.24138	2.00671	1.04078	1.34868	0.798291
Tetracosanoic acid (24:0)	1.16403	0.710371	0.694803	0.365388	1.70028	0.373061	1.07455	0.0761413	1.82367	0.224308	1.4387	0.175223	1.32595	0.374975	0.978482	0.282118	1.83115	0.658923	1.2193	0.27293
Sum	160.677	31.9682			158.403	34.2279			127,41***	14.4634			142.134	50.262			145.387	35.4312

## Sheet: Wax compounds
Data Set S1. GC-MS analysis of cuticle composition in tbr mutants.
b) GC-MS analysis of cuticular wax composition in tbr mutants.
Values [ng x leaf cm-2 ] are means ± SD (n = 6 individual plants per line).
Asterisks denote statistical differences (**, p < 0.01; ***, p < 0.001) to Col-0 or pGC1:YC3.6 according to two-way ANOVA followed by Tukey's multiple comparisons test.
FA, fatty acid.
Compound	pGC1:YC3.6		tbr-6		tbr-7		Col-0		tbr-1
	mean	± SD	mean	± SD	mean	± SD	mean	± SD	mean	± SD
C29-alkane	173.042	28.9164	290,85 ***	64.8529	129.826	43.0984	216.615	88.5519	177.387	69.7086
C31-alkane	173.431	47.5208	244,4**	67.4268	129.359	71.5279	220.456	90.7028	155,53**	48.8303
C33-alkane	30.2229	13.5336	35.4515	18.1027	13.7473	9.88974	33.9961	13.0971	25.6324	11.7945
C26-OH	2.20785	1.18132	1.13797	0.760996	1.50908	0.601425	3.08939	0.970978	1.67888	0.661626
C28-OH	8.34156	2.76797	5.18458	2.01944	5.35809	1.19814	13.8316	5.02513	8.66285	2.23661
C30-OH (1)	28.4734	13.7142	34.6116	5.64605	11.0296	1.33532	37.2966	10.3501	43.4392	18.8567
C30-OH (2)	13.2123	4.3722	13.0947	3.12128	5.03846	1.33	19.795	7.88556	18.747	8.02258
C32-OH (1)	37.993	23.6314	37.6114	6.43275	11.1659	1.31706	53.5702	19.5086	46.7952	18.8224
C32-OH (2)	2.96185	1.30627	1.83837	0.856104	0.781618	0.249723	4.89698	2.45794	3.53589	2.29716
Cholesterol	23.7075	9.23671	51.4273	27.4213	11.9941	2.18587	36.6444	7.32854	36.486	9.45149
Sitosterol	21.0555	9.95763	42.3562	6.05161	41.9392	10.0251	39.3168	10.7435	73.522	30.7574
C24-FA	34.4136	12.3163	37.3081	7.99106	24.1938	5.01885	34.1895	14.0532	67.7952	50.1507
C26-FA	90.455	26.8688	107.308	31.8515	59.1226	10.1399	98.4047	55.333	177,39***	145.579
C28-FA	18.1707	5.00594	19.3633	6.16129	10.9776	2.46588	22.7733	11.8665	38.6974	35.374
C30-aldehyde	28.8717	7.74301	18.3623	4.46449	19.7527	11.2009	26.455	9.7285	67.963	55.7217
C32-aldehyde	20.0373	5.24633	5.84447	5.98938	10.1058	9.04594	24.0429	9.02884	52.3785	55.4106
