# Supplementary material for: TBR is an RG-I rhamnose O-acetyltransferase required for epidermal cell adhesion in Arabidopsis thaliana
Source: Research Square preprint supplement (doi:10.21203/rs.3.rs-5416360/v1), 2024-12-27
Supplement: Supplementary file 2 [file 63d57d965acb16bc1c32d01b.xlsx]

## Sheet: RG-I and HG NMR assignments
	Supplementary Data Set 2. Chemical shift assignments of carbohydrate residues in intact, acetylated and Me-esterified RG-I and HG oligomers.
	For each group in a residue, the first row shows 1H and the second row 13C chemical shift (both in ppm).
	Legend: * acetyl or methyl ester || /, not determined
	RG-I10	pD 5.0
	Residue	Group								Linkage	Structure identification
		1	2	3	4	5	6	CH3*	CO(Ac)
	D	5.13	3.82	4.35	5.83					D1→S2
	Δ4,5-αHexA(1→	100.5	72.8	68.6	110.3	/	/
	G	5.02	3.93	4.14	4.43	4.68				G1→R2
	4-αGalA(1→	100.2	70.6	72.9	80	74.1	/
	Gy	5.07	3.93	4.14	4.43	/				Gy1→Y2
	4-αGalA(1→	100.5	70.6	72.9	80	/	/
	R	5.28	4.13	3.89	3.43	3.8	1.26			R1→G4
	2-αRha(1→	101.2	78.7	72.1	74.6	71.7	19.3
	S	5.34	4.33	3.87	3.36	3.8	1.26			S1→G4
	2-αRha(1→	101.2	79.7	72.1	74.9	71.7	19.3
	Y	5.24	3.98	3.9	3.49	3.89	1.3
	2-αRha-OH	94.3	79.4	72.1	74.7	71.3	19.4
	Z	4.96	4.06	3.68	3.36	3.44	1.32
	2-βRha-OH	96.7	82.6	74.7	74.6	75	19.4
	Acetylated RG-I10	pD 6.6
	Residue	Group								Linkage	Structure identification
		1	2	3	4	5	6	CH3*	CO(Ac)
	D	5.11	3.79	4.33	5.8					D1→S2
	Δ4,5-αHexA(1→	100.6	72.9	68.6	110.2	147.9	172
	G	5.01	3.91	4.11	4.42	4.66				G1→R2
	4-αGalA(1→	100.2	70.6	73	79.9	74.1	177.6
	Gq	4.95	3.9	4.08	4.44	4.57				Gq1→Q2
	4-αGalA(1→	101.8	70.5	72.9	79.8	74.3	177.2
	Gv	4.98	3.9	4.1	4.43	4.58				Gv1→V2
	4-αGalA(1→	101.9	70.5	72.9	79.9	74.3	177.2
	Gw	5.04	3.95	4.15	/	/				Gw1→W2
	4-αGalA(1→	/	70.5	73.1	/	/	/
	Gy	5.05	3.92	4.12	4.41	4.66				Gy1→Y2
	4-αGalA(1→	100.4	70.6	72.9	80	74.1	/
	R	5.27	4.12	3.89	3.41	3.8	1.25			R1→G4
	2-αRha(1→	101.2	78.8	72.1	74.7	71.7	19.3
	Q	5.22	4.22	5.11	3.58	3.91	1.28	2.09		Q1→G’4
	2-(3OAc)αRha(1→	101.9	78.7	75.2	72.8	71.9	19.2	23	176.3
	S	5.32	4.31	3.87	3.34	3.81	1.24			S1→G4
	2-αRha(1→	101.2	79.8	72.1	75	71.7	19.3
	Y	5.23	3.97	3.88	3.47	3.88	1.28
	2-αRha-OH	94.3	79.4263	72.1	74.7	71.3	19.3
	V	5.19	4.05	5.14	3.67	3.98	1.31	2.1
	2-(3OAc)αRha-OH	94.9	79.2	74.9	72.7	71.5	19.4	23	176.3
	Z	4.93	4.05	3.66	3.34	3.42	1.3
	2-βRha-OH	96.7	82.7	74.7	74.9	74.6	19.4
	W	5	4.14	4.88	3.56	3.53	1.32	/
	2-(3OAc)βRha-OH	96.3	81.3	76.9	72.4	74.6	19.4	/	/
	RG-I10 Me ester
	Residue	Group								Linkage	Structure identification
		1	2	3	4	5	6	CH3*	CO(Ac)
	D	5.2	3.85	4.4	6.15			3.82		D1→S2
	Δ4,5-αHexA(1→	101.2	72.5	68.3	115.7	142.9	166.8	55.8
	G	5.06	3.88	4.11	4.48	5.08		3.83		G1→R2
	4-αGalA(1→	100.7	70.4	71.9	81.2	73	173.6	55.8
	Gy	5.07	3.93	4.14	4.43	5.1		/		Gy1→Y2
	4-αGalA(1→	100.5	70.6	72.9	80	73	173.6	/
	R	5.16	4.11	3.84	3.43	3.5	1.27			R1→G4
	2-αRha(1→	102.1	79.4	71.8	74.3	72.2	19.4
	S	5.2	4.27	3.79	3.35	3.5	1.25			S1→G’4
	2-αRha(1→	102.2	79.8	71.7	74.5	72.2	19.4
	Y	5.21	3.93	3.88	3.46	3.88	1.28
	2-αRha-OH	94.4	80.2	71.8	74.7	71.3	19.4
	Z	4.95	4.03	3.68	3.34	3.43	1.3
	2-βRha-OH	96.5	82.8	74.5	74.5	75	19.4
	HG10	pD 5.4
	Residue	Group								Linkage	Structure identification
		1	2	3	4	5	6	CH3*	CO(Ac)
	D	5.09	3.73	4.26	5.79					D1→E4
	Δ4,5-αHexA(1→	101.7	72.9	68.6	109.5	/	/
	E	5.07	3.72	3.97	4.58	4.81				E1→G4
	4-αGalA(1→	101.7	71.2	71.5	81.8	74.1	/
	G	5.09	3.76	3.99	4.43	4.76				G1→G4
	4-αGalA(1→	101.7	70.9	71.6	80.6	74.1	/
	Y	5.3	3.83	3.99	4.43	4.42
	4-αGalA-OH	94.9	70.7	71.4	80.8	73.3	/
	Z	4.6	3.5	3.75	4.37	4.05
	4-βGalA-OH	98.9	74.1	75	79.9	77	/
	Acetylated HG10	pD 5.5
	Residue	Group								Linkage	Structure identification
		1	2	3	4	5	6	CH3*	CO(Ac)
	D	5.09	3.73	4.27	5.79					D1→E4
	Δ4,5-αHexA(1→	101.7	72.9	68.6	109.6	148.1	/
	E	5.07	3.72	3.98	4.58	4.81				E1→G4
	4-αGalA(1→	101.7	71.1	71.5	81.8	74	177.8
	G	5.08	3.76	4	4.42	4.76				G1→G4
	4-αGalA(1→	101.7	70.9	71.5	80.6	73.9	178.1
	Gz	5.1	3.77	4.02	4.43	4.76				Gz1→Z4
	4-a-GalA(1→	101.8	70.9	71.5	80.5	73.9	/
	H	5.14	3.99	5.21	4.53	4.85		2.08		H1→G’4
	4-(3OAc)αGalA(1→	101.5	69.1	74.3	79.6	74.1	/	23	176.2
	I	5.03	3.75	4	4.41	4.58				I1→H4
	4-αGalA(1→	102.6	70.7	71.5	80.7	74.3	/
	Y	5.31	3.83	3.99	4.43	4.42
	4-αGalA-OH	94.9	70.7	71.4	80.9	73.2	177.8
	V	5.37	4.07	5.22	4.54	4.49		/
	4-(3OAc)αGalA-OH	94.8	68.9	74.3	79.5	73.4	/	/	/
	Z	4.59	3.5	3.75	4.38	4.06
	4-βGalA-OH	98.9	74.1	75	79.9	76.9	177.1
	W	4.72	3.72	4.99	4.49	4.15		/
	4-(3OAc)βGalA-OH	98.6	/	77.1	78.8	77	/	/	/
	HG11 Me ester
	Residue	Group								Linkage	Structure identification
		1	2	3	4	5	6	CH3*	CO(Ac)
	D	5.03	3.72	4.43	6.11			3.81		D1→E4
	Δ4,5-αHexA(1→	102.8	72.5	68.1	115	/	/	55.7
	E	4.95	3.66	3.96	4.59	5.12		/		E1→G4
	4-αGalA(1→	103.1	70.5	70.5	81.5	73.2	/	/
	G	4.96	3.72	4	4.46	5.08		3.8		G1→G4
	4-αGalA(1→	103.1	70.5	70.5	81.7	73.3	/	55.6
	Y	5.36	3.8	4.03	4.47	4.83		/
	4-αGalA-OH	95.1	70.5	70.5	81.6	72.5	/	/
	Z	4.67	3.48	3.8	4.41	4.5		/
	4-βGalA-OH	99.1	73.8	74	81.1	75.9	/	/
