# Supplementary material for: TBR is an RG-I rhamnose O-acetyltransferase required for epidermal cell adhesion in Arabidopsis thaliana
Source: Research Square preprint supplement (doi:10.21203/rs.3.rs-5416360/v1), 2024-12-27
Supplement: Supplementary file 3 [file d98327522b6db8783790d1f7.xlsx]

## Sheet: Arabidopsis lines and primers
Supplementary Data Set 3. List of Arabidopsis thaliana lines, primers, vectors and antibodies used in this study.
Line	AGI code(s)	References	Source/Donor	Primer name	Sequence	Comments
pGC1:YC3.6	-	Yang et al., 2008	Julian Schroeder
G10-1/tbr-6 (pGC1:YC3.6 background)	AT5G06700	this study		G10_1 / tbr-1_CAPS_F	TACCGGAAACAGAGCTT	digest amplicon with HpaII
				G10_1 / tbr-1_CAPS_R	CGGATTCACATTCTTCTCAAC
G8-40/tbr-7 (pGC1:YC3.6 background)	AT5G06700	this study		G8-40_CAPS_F	TACCGGAAACAGAGCTT	digest amplicon with SmaI
				G8-40_CAPS_R	CTCTACACATTCTATAATCAACAATT
tbr-1	AT5G06700	Potikha and Delmer, 1995	NASC	G10_1 / tbr-1_CAPS_F	TACCGGAAACAGAGCTT	digest amplicon with HpaII
				G10_1 / tbr-1_CAPS_R	CGGATTCACATTCTTCTCAAC
tbr-8c	AT5G06700	this study		bTM line 1_dCAPS_F	ACGCCGTTAAGTATATGCCAATCCG	digest amplicon with HpaII
				bTM line 1_dCAPS_R	TAGAGAACCAAGGAGAAGATG
tbr-4 (SALK_058509C)	AT5G06700	this study	NASC	SALK_058 & SALK_134_LP	ACGATTTTGCGTTTGAAAATG	note that this line was named tbr-3 by Zhong et al., (2024)
				SALK_058 & SALK_134_RP	ATCTGGGTTGGTTCCGTTTAC
tbr-5 (SALK_134014)	AT5G06700	this study	NASC	SALK_058 & SALK_134_LP	ACGATTTTGCGTTTGAAAATG
				SALK_058 & SALK_134_RP	ATCTGGGTTGGTTCCGTTTAC
tbr-1 esmd1-1		this study
tbr-6 esmd1-1		this study
tbr-7 esmd1-1		this study
tbr-1 gl1-1		this study
tbr-8c gl1-1		this study
ghr1-3 (GK_760C07)	AT4G20940	Sierla et al., 2018	NASC	GK_760C07_LP	TGGCCCTTCTAAGCTGTTAGA
				GK_760C07_RP	CTCCTTATCTGGACCTTTGCC
bdg-6	AT1G64670	Jakobson et al., 2016		BDG_LP	ATGGGATTCTCACGGTCG
				BDG-6gtRP	AGGAGTGAAGGGCGAGAGTAG
				BDG_LB7	CCGCAGCGTTATTATAAAATGAAAG
qua2-1	AT1G78240	Mouille et al., 2007	Grégory Mouille	qua2-1_MboI_TaqI_F	TATTGATATATTCACAGAGATTGAT	digest amplicon with MboI
				qua2-1_dCAPS_R	TCACGGATTATCACCCATCC
esmd1-1	AT2G01480	Verger et al., 2016	Grégory Mouille	esmd1-1_AluI_F	TGTTCAGAATTTCTCTTCCAGAATA	digest amplicon with AluI
				esmd1-1_dCAPS_R	CCGATGTTTGGATTGTCAAA
qua2-1 esmd1-1		Verger et al., 2016	Grégory Mouille
gl1-1	AT3G27920	Herman and Marks, 1989	NASC	gl1_dCAPS_F	TATTTTTTTCCCAAATTCAGATGGC	digest amplicon with HaeIII (BsuRI)
				gl1_dCAPS_R	GCTGAGATGAGTGTTCCAGTAGTTC
SAIL_753_C03	AT5G07400	-	NASC	SAIL_753_LP	TTTGGCCGTTCAATACTCAAC
				SAIL_753_RP	AAACAGTTCCCAAAGCACATG
Wiscseq_DsLox342G03.3	AT5G07400	-	NASC	Wiscs_342_LP	AAGACAAGACACCATGATGGC
				Wiscs_342_RP	ATGATTCCACAGGAGCACAAC
pme46-1 (SAIL_612_D02)	AT5G04960	Geng et al., 2017	NASC	pme46_LP	AGAAACATGAGAAGCACTCGC
				pme46_RP	GCTGTGTTAATGAAGCCCATG
pme46-2 (SALK_136669)	AT5G04960	Geng et al., 2017	NASC	pme46_RP	GCTGTGTTAATGAAGCCCATG
				pme46_LP	AGAAACATGAGAAGCACTCGC
GK-149G04	AT5G07010	-	NASC	GK&SALK_LP	CGATAACAACTGAGGCTGCTC
				GK&SALK_RP	GGCTGACAATCTTTCCACTTG
SALKseq_083506.1	AT5G07010	-	NASC	GK&SALK_LP	CGATAACAACTGAGGCTGCTC
				GK&SALK_RP	GGCTGACAATCTTTCCACTTG
SALKseq_135356.3	AT5G03920	-	NASC	SALK_135356_LP	CTGTTAAAGGGCTTTAACGGG
				SALK_135356_RP	TTCCAGTATTCCTAATTCATTGAGG
GK-144C05	AT5G02590	-	NASC	GK-144_LP	CTTGCATTTCTCAATCGCTTC
				GK-144_RP	CAAAAATCAACAGATGATGGG
SALKseq_085413.3	AT5G06000	-	NASC	SALK_LP/ Wisc_RP	ATGGCTGACTAACGTGTCCAC
				SALK_RP/ Wisc_LP	CTTCAATGATTCGAAGAAGCG
WiscDsLoxHs051_04A.1	AT5G06000	-	NASC	SALK_RP/ Wisc_LP	CTTCAATGATTCGAAGAAGCG
				SALK_LP/ Wisc_RP	ATGGCTGACTAACGTGTCCAC
SAIL_296_B04	AT5G02700	-	NASC	SAIL_296_LP	TACACGCGTTTCCTTTCTTTG
				SAIL_296_RP	CTCGATCCAGCTATCAACCTG
SALK_086243	AT5G02700	-	NASC	SALK_086243_LP	GAATGGAGTTGTAAAGAATTTTGC
				SALK_086243_RP	CCTCTTTGAGCGAAGCTAACC
				SALK_LBb1.3	ATTTTGCCGATTTCGGAAC
				SAIL_LB3	TAGCATCTGAATTTCATAACCAATCTCGATACAC
				GK_o8474	ATAATAACGCTGCGGACATCTACATTTT
				Wisc:p745	AACGTCCGCAATGTGTTATTAAG
Sequencing primers
Target	AGI code	Primer name	Sequence	Comments
TBR	AT5G06700	TBR COMPL FW 2 (TBR seq 1 Fw)	AAAAAGCAGGCTGAAGAGATGTGAGGAGATGGAT	Used for sequencing and cloning of the TBR sequence
		TBR seq 1 Rv	GGTGGCAGGTTTGGGTAAAGAG
		TBR seq 2 Fw	TAAACAAGTAGAGTCCACAC
		TBR seq 2 Rv	GTTGTTGCTGTTGTTCCTCCGCCGTG
		TBR seq 3 Fw	AAACCACTCGTCACGCGCCAC
		TBR seq 3 Rv	AATCTTTGTCTGGTCTTCCGTTG
		TBR seq 4 Fw	TCGACGGTGAATGGATCAAAG
		G10_1 / tbr-1_CAPS_R (TBR seq 4 Rv)	CGGATTCACATTCTTCTCAAC	Used for sequencing and genotyping of the TBR sequence
		TBR seq 5 Fw	TTTGGAGTTTGTTTCATAGGGAGG
		G8-40_CAPS_R (TBR seq 5 Rv)	CTCTACACATTCTATAATCAACAATT	Used for sequencing and genotyping of the TBR sequence
		G8-40_CAPS_F (TBR seq 6 Fw)	TACCGGAAACAGAGCTT	Used for sequencing and genotyping of the TBR sequence
		TBR COMPL RV 2 (TBR seq 6 Rv)	AGAAAGCTGGGTCTGTGTACGGGTGAGTTTCTTCAG	Used for sequencing and cloning of the TBR sequence
Q-PCR primers
Target	AGI code	Primer name	Sequence	Amplification efficiency
TBR	AT5G06700	TBR_qPCR_F	GCTATTCCGCATCCCATTTCAGTG	1.987
		TBR_qPCR_R	TGTTTCGCTATCGCATGCTCCTC
TIP41	AT4G34270	TIP41_QPCR_F	GTGAAAACTGTTGGAGAGAAGCAA	1.987
		TIP41_QPCR_R	TCAACTGGATACCCTTTCGCA
YLS8	AT5G08290	YLS8_QPCR_F	TTACTGTTTCGGTTGTTCTCCATTT	1.954
		YLS8_QPCR_R	CACTGAATCATGTTCGAAGCAAGT
SAND	AT2G28390	SAND_QPCR_F	CAGACAAGGCGATGGCGATA	1.931
		SAND_QPCR_R	GCTTTCTCTCAAGGGTTTCTGGGT
Cloning primers (Complementation & CRISPR)
Target	Primer name	Sequence		Comments
TBR	TBR COMPL FW 2	AAAAAGCAGGCTGAAGAGATGTGAGGAGATGGAT		TBR + adapter pDONR/Zeo
	TBR COMPL RV 2	AGAAAGCTGGGTCTGTGTACGGGTGAGTTTCTTCAG		TBR + adapter pDONR/Zeo
	TBR_REV_SEQ1	CCGTGGATTGGCATATACTTCAATCACTACTTCGACTCTAGCTGT		sgRNA + adapter pHEE2E-TRI
	TBR_FWD_SEQ1	AAGTATATGCCAATCCACGGGTTTTAGAGCTAGAAATAGCAAGTT		sgRNA + adapter pHEE2E-TRI
pDONOR_Zeo (vector)	AttB1 adapter Fw	GGGGACAAGTTTGTACAAAAAAGCAGGCT		Adapter pDONOR_Zeo
	AttB1 adapter Rv	GGGGACCACTTTGTACAAGAAAGCTGGGTC		Adapter pDONOR_Zeo
pHEE2E-TRI (vector)	HindIII-U6-26p fw	CCCAAGCTTCGACTTGCCTTCCGCACAATAC		Adapter pHEE2E_TRI
	NcoI-U6-26t rv	CCCCCATGGTATTGGTTTATCTCATCGGAAC		Adapter pHEE2E_TRI
	pHEE2E-TRI_ 139 fw	CTCTTCGCTATTACGCCAG		Sequencing primer
	pHEE2E-TRI_ 1706 rev	CTCTCTTAGGTTGTTTCTGTTG		Sequencing primer
Cloning primers - generation of constructs for expression of recombinant protein in HEK293F cells
Target	Primer name	Sequence	GFP FU*	Comments
TBR	G427E Fw	CTTTAATACCgaaCATTGGTGGAC	765	Lowercase nucleotides in the primer sequences represent the bases changed to generate mutant variants.
	G427E Rv	ACAATAACATCAGCTCCTTTG
	G427R Fw	TTTAATACCcgaCATTGGTGGAC	515	Lowercase nucleotides in the primer sequences represent the bases changed to generate mutant variants.
	G427R Rv	ACAATAACATCAGCTCCTTTG
	P580L Fw	TTGGTGCCTCctcGGGGTTCCAG	239	Lowercase nucleotides in the primer sequences represent the bases changed to generate mutant variants.
	P580L Rv	TGGCTGCAGTCTTGGTACAGCAATG
pGEn2-DEST (Vector)	pGEN2-DEST-TBR WT Fw	AACTTGTACTTTCAAGGCTCTTCTCCTTGGTTCTCTAAC	1636
	pGEN2-DEST-TBR WT Rv	ACAAGAAAGCTGGGTCCTAAGTTTTTCGTTGTGTTTGGCT
			*Expression and secretion of the recombinant GFP-fusion proteins and protein variants in transiently transfected HEK293F cells. Expression levels are determined by measuring the relative GFP fluorescence (FU) of the secreted GFP fusion proteins in clarified media.
References
Bessire M, Chassot C, Jacquat AC, Humphry M, Borel S, Petétot JMDC, Métraux JP, Nawrath C (2007) A permeable cuticle in Arabidopsis leads to a strong resistance to Botrytis cinerea. EMBO J 26: 2158–2168
Geng X, Horst WJ, Golz JF, Lee JE, Ding Z, Yang Z-B (2017) LEUNIG_HOMOLOG transcriptional co-repressor mediates aluminium sensitivity through PECTIN METHYLESTERASE46-modulated root cell wall pectin methylesterification in Arabidopsis. Plant J 90: 491-504
Herman PL, Marks MD. (1989) Trichome Development in Arabidopsis thaliana. II. Isolation and Complementation of the GLABROUS1 Gene. The Plant Cell 1: 1051–1055
Jakobson L, Lindgren LO, Verdier G, Laanemets K, Brosché M, Beisson F, Kollist H (2016) BODYGUARD is required for the biosynthesis of cutin in Arabidopsis. New Phytol 211: 614-626
Manabe Y, Nafisi M, Verhertbruggen Y, Orfila C, Gille S, Rautengarten C, Cherk C, Marcus SE., Somerville S, Pauly M, Knox J.P, Sakuragi Y, Scheller HV. (2011) Loss-of-function mutation of REDUCED WALL ACETYLATION2 in Arabidopsis leads to reduced cell wall acetylation and increased resistance to Botrytis cinerea. Plant Physiol 155: 1068–1078
Mouille G, Ralet M-C, Cavelier C, Eland C, Effroy D, Hématy K, McCartney L, Truong HN, Gaudon V, Thibault J-F, et al (2007) Homogalacturonan synthesis in Arabidopsis thaliana requires a Golgi-localized protein with a putative methyltransferase domain. Plant J 50: 605–614
Potikha T, Delmer DP (1995) A mutant of Arabidopsis thaliana displaying altered patterns of cellulose deposition. The Plant Journal 7: 453-460
Sierla M, Hõrak H, Overmyer K, Waszczak C, Yarmolinsky D, Maierhofer T, Vainonen JP, Salojärvi J, Denessiouk K, Laanemets K, et al (2018) The receptor-like pseudokinase GHR1 is required for stomatal closure. Plant Cell 30: 2813–2837
Verger S, Chabout S, Gineau E, Mouille G (2016) Cell adhesion in plants is under the control of putative O-fucosyltransferases. Development 143: 2536–40
Yang Y, Costa A, Leonhardt N, Siegel RS, Schroeder JI (2008) Isolation of a strong Arabidopsis guard cell promoter and its potential as a research tool. Plant Methods 4: 6
Zhong K, Zhang P, Wei X, Platre MP, He W, Zhang L, Małolepszy A, Cao M, Hu S, Tang S, Li B, Hu P, Busch W (2024) Natural variation of TBR confers plant zinc toxicity tolerance through root cell wall pectin methylesterification. Nat Commun 15: 5823

## Sheet: Antibodies
Antibody	Source	Comments	References
LM19	https://plantcellwalls.leeds.ac.uk/science/antibodies/rat-mabs/		Verhertbruggen et al., 2009
LM20	https://plantcellwalls.leeds.ac.uk/science/antibodies/rat-mabs/		Verhertbruggen et al., 2009
LM5	https://plantcellwalls.leeds.ac.uk/science/antibodies/rat-mabs/		Jones et al., 1997; Andersen et al., 2016
LM26	https://plantcellwalls.leeds.ac.uk/science/antibodies/rat-mabs/		Torode et al., 2018
Anti-rat-IgG-Alexa Fluor 488	Thermo Fisher	Cat. No. A-11006
Anti-rat-IgG-HRP	Thermo fisher	Cat. No. 11889140
References
Andersen MCF, Boos I, Marcus SE, Kračun SK, Rydahl MG, Willats WGT, Knox JP, Clausen MH (2016) Characterization of the LM5 pectic galactan epitope with synthetic analogues of β-1,4-d-galactotetraose. Carbohydrate Research 436: 36-40
Jones L, Seymour GB, Knox JP (1997) Localization of Pectic Galactan in Tomato Cell Walls Using a Monoclonal Antibody Specific to (1[->]4)-β-D-Galactan. Plant Physiology 113: 1405–1412
Torode TA, O’Neill R, Marcus SE, Cornuault V, Pose S, Lauder RP, Kračun SK, Rydahl MG, Andersen MCF, Willats WGT, Braybrook SA, Townsend BJ, Clausen MH, Knox JP (2018) Branched Pectic Galactan in Phloem-Sieve-Element Cell Walls: Implications for Cell Mechanics. Plant Physiology 176: 1547–1558
Verhertbruggen Y, Marcus SE, Haeger A, Ordaz-Ortiz JJ, Knox JP (2009) An extended set of monoclonal antibodies to pectic homogalacturonan. Carbohydrate Research 344: 1858-1862
